# Supplementary material for: Mechanistic study of ethanol steam reforming on TM–Mo6S8clusters: a DFT study
Source: Royal Society of Chemistry journal article supplement (doi:10.1039/c8cy02151a), 2019-01-01
Supplement: c8cy02151a1.pdf [file c8cy02151a1.pdf]

## Supporting Information

### Mechanistic study of ethanol steam reforming on TM-Mo<sub>6</sub>S<sub>8</sub>: a DFT study

Zijun Hao,<sup>ab</sup> Ling Guo,<sup>\*ab</sup> Minmin Xing<sup>ab</sup> and Qian Zhang<sup>ab</sup>

a. Key Laboratory of Magnetic Molecules & Magnetic Information Materials Ministry of Education, Shanxi

Normal University, Linfen, China, 041004.

b. The School of Chemical and Material Science, Shanxi Normal University, No. 1, Gongyuan Street, Linfen,

China, 041004.

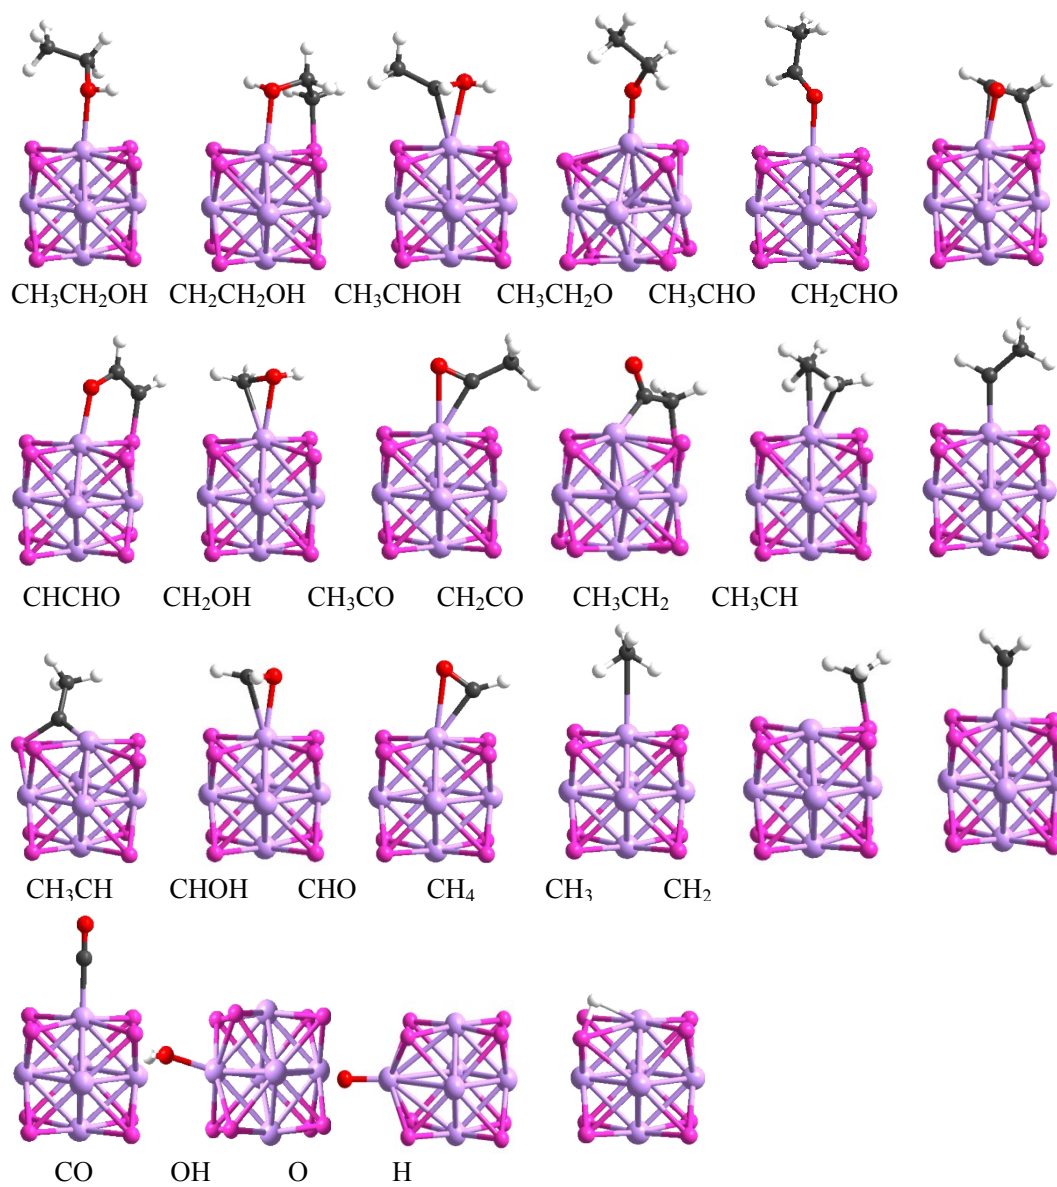

**Figure. S1** Adsorption geometries of pertinent species on  $\text{Mo}_6\text{S}_8$ . Atom colors are Mo (purple), S (Pink), O (red), C (black), and H (white).

**Table S1** Calculated adsorption energies ( $E_{ads}$ ) and key geometrical parameters of pertinent species on Mo<sub>6</sub>S<sub>8</sub>.

| Species                                        | $E_{ads}$<br>(kcal/mol) | preferred adsorption site | Key parameter (Å)                                  |
|------------------------------------------------|-------------------------|---------------------------|----------------------------------------------------|
| CH <sub>3</sub> CH <sub>2</sub> OH*            | -24.32                  | Mo-top via O              | Mo-O:2.279                                         |
| CH <sub>3</sub> CHOH*                          | -36.58                  | Mo-top via C and O        | Mo-C:2.301; Mo-O:2.326                             |
| CH <sub>2</sub> CH <sub>2</sub> OH*            | -53.41                  | Mo-S bridge via C and O   | S-C:1.869; Mo-O:2.276                              |
| CH <sub>3</sub> CH <sub>2</sub> O*             | -45.59                  | Mo-top via O              | Mo-O:1.901                                         |
| CH <sub>2</sub> CH <sub>2</sub> O*             | -24.81                  | Mo-S bridge via C and O   | S-C:1.856; Mo-O:1.916                              |
| CH <sub>3</sub> CHO*                           | -23.69                  | Mo-top via O              | Mo-O:2.216                                         |
| CH <sub>2</sub> CHO*                           | -31.74                  | Mo-S bridge via C and O   | S-C:1.922; Mo-O:2.199                              |
| CH <sub>2</sub> OH*                            | -40.32                  | Mo-top via C and O        | Mo-C:2.221; Mo-O:2.283                             |
| CH <sub>3</sub> CO*                            | -40.23                  | Mo-top via C and O        | Mo-C:2.131; Mo-O:2.348                             |
| CH <sub>2</sub> CO*                            | -4.49                   | Mo-S bridge via C         | Mo-C:2.066; S-C:1.850                              |
| CH <sub>2</sub> O*                             | -15.31                  | Mo-top via C and O        | Mo-C:2.429; Mo-O:2.175                             |
| CH <sub>3</sub> CH <sub>2</sub> * <sup>†</sup> | -30.80                  | Mo-top via C              | Mo-C <sub>1</sub> :2.267; Mo-C <sub>2</sub> :2.487 |
| CH <sub>3</sub> CH*                            | -71.03                  | Mo-top via C              | Mo-C:2.035                                         |
| CH <sub>3</sub> C*                             | -98.35                  | S-Mo bridge via C         | S-C:1.745; Mo-C:2.101                              |
| CHO*                                           | -37.44                  | Mo-top via C and O        | Mo-C:2.109; Mo-O:2.435                             |
| CH <sub>4</sub> *                              | -4.80                   | Mo-top via C              | Mo-C:2.831                                         |
| CH <sub>3</sub> *                              | -36.22                  | Mo-S bridge via C         | S-C:1.871; Mo-C:2.859                              |
| CH <sub>2</sub> *                              | -78.04                  | Mo-top via C              | Mo-C:2.002                                         |
| CO*                                            | -33.61                  | Mo-top via C              | Mo-C:2.081                                         |
| OH*                                            | -60.30                  | Mo-top via O              | Mo-C:1.936                                         |
| H*                                             | -46.88                  | S-Mo bridge via H         | S-H:1.3899; Mo-H:2.367                             |
| O*                                             | -421.20                 | Mo-top via O              | Mo-O:1.709                                         |
